# Supplementary material for: A pH-responsive Eu(iii) functionalized metal–organic framework hybrid luminescent film for amino acid sensing and anti-counterfeiting
Source: Royal Society of Chemistry journal article supplement (doi:10.1039/d2tc00530a), 2022-01-01
Supplement: d2tc00530a1.pdf [file d2tc00530a1.pdf]

## Supporting Information

### **A pH-stimuli-responsive Eu (III) functionalized metal-organic frameworks hybrid luminescent film for amino acids sensing and anti-counterfeiting**

Haifeng Sha<sup>†</sup>, Bing Yan<sup>\*,†,‡</sup>

<sup>†</sup>School of Chemical Science and Engineering, Tongji University, Siping Road 1239, Shanghai 200092, China.

<sup>‡</sup>School of Materials Science and Engineering, Liaocheng University, Liaocheng 252059, China

---

\* Corresponding author.

E-mail address: byan@tongji.edu.cn.

## 1. Experimental Section

### 1.1. Instruments and Characterization.

X-ray diffraction (PXRD) patterns have been acquired using a Bruker D8 ADVANCE diffractometer, employing Cu K $\alpha$  radiation source (40 mA and 40 kV). Fourier transforms infrared (FTIR) spectra were recorded on a Nexus 912 AO446 infrared spectrum radiometer using KBr as a reference. X-ray photoelectron spectroscopy (XPS) investigation was carried out under ultrahigh vacuum ( $<10^{-6}$  Pa) at pass energy of 93.90 eV with an Axis Ultra DLD spectrometer (Kratos, Japan) equipped with an Mg K $\alpha$  radiation source (1253.6 eV). UV-vis absorption spectra were measured on an Agilent 8453 spectrometer. Scanning electron microscopy (SEM) was performed on a Hitachi S-4800 field emission scanning electron microscope operating at 3 kV. Energy dispersive X-ray (EDX) spectra and elemental mapping images were acquired on a scanning electron microscope, operating at 5 kV. Fluorescence spectra were tested at an Edinburgh FLS920 spectrophotometer with a 450 W xenon lamp as the excitation light source using an appropriate cutoff filter. Zeta potentials were conducted on an Anton Paar Litesizer 500. The corresponding Commission Internationale de l'Eclairage (CIE) color coordinates were calculated based on the international CIE standards.

### 1.2. Preparation of ZnMOF@SA hydrogel.

The uniform suspension of ZnMOF (20 mg) powder was prepared by the ultrasonic method in deionized water (2 mL). Deionized water (20 mL) was heated to boiling, then the sodium alginate (SA) powder (1.0 g) was dissolved to form a SA solution. The homogeneous mixture (ZnMOF@SA) was obtained by dropping the suspension of ZnMOF into the SA solution with continuously stirring for 1 h. Subsequently, the mixture was poured into a purchased mold and cooled to room temperature to shape the ZnMOF@SA hydrogel.

### 1.3. Preparation of ZnMOF@SA Film

The prepared ZnMOF@SA hydrogel was heated and dried in an oven at 80°C for 2 h to obtain the ZnMOF@SA Film.

## 2. Supporting Figures and Tables

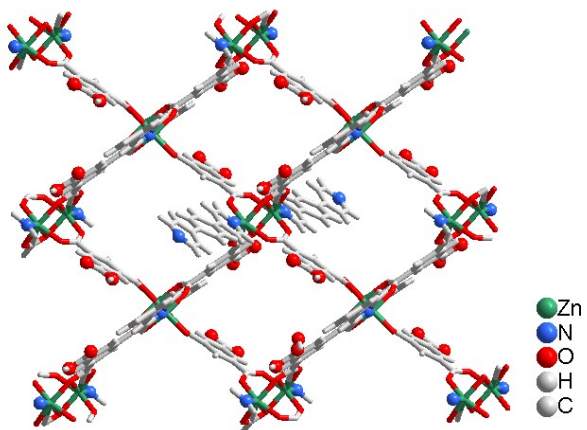

**Fig. S1.** View of the 2D layered structural unit formed by Zn(II) ions and the ligands.

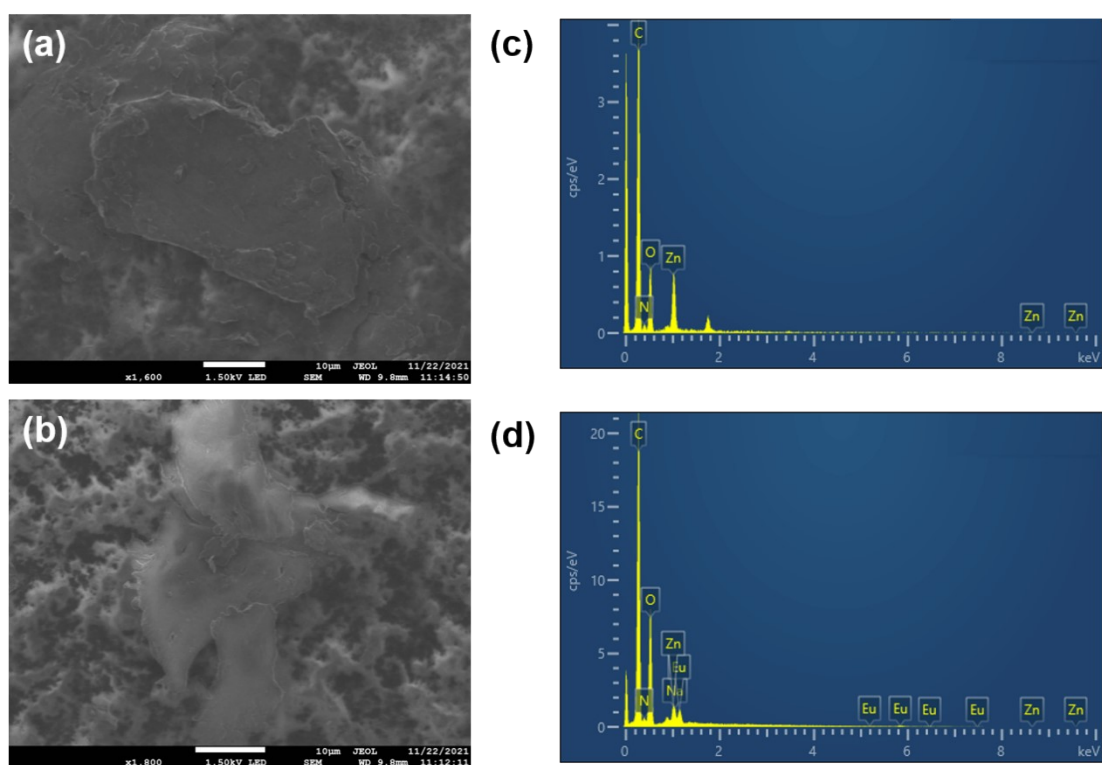

**Fig. S2.** SEM images of ZnMOF (a, b) and EDS energy spectra of ZnMOF (c) and **1@SA** (d).

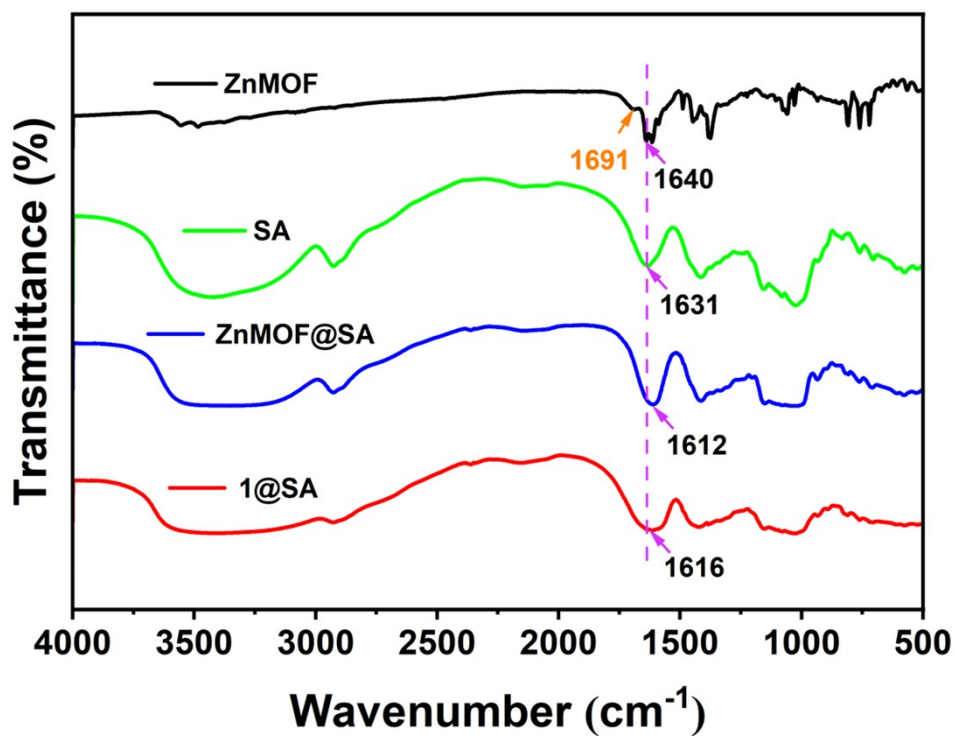

Fig. S3. The FT-IR spectra of ZnMOF, SA, ZnMOF@SA, and 1@SA.

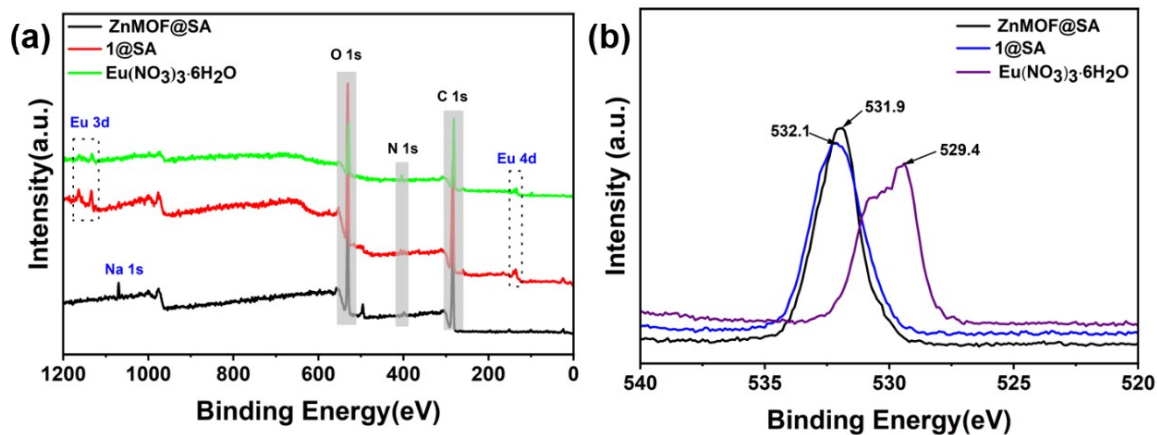

Fig. S4. XPS spectra (a) and O 1s XPS (b) for ZnMOF@SA, 1@SA, and  $\text{Eu}(\text{NO}_3)_3 \cdot 6\text{H}_2\text{O}$ .

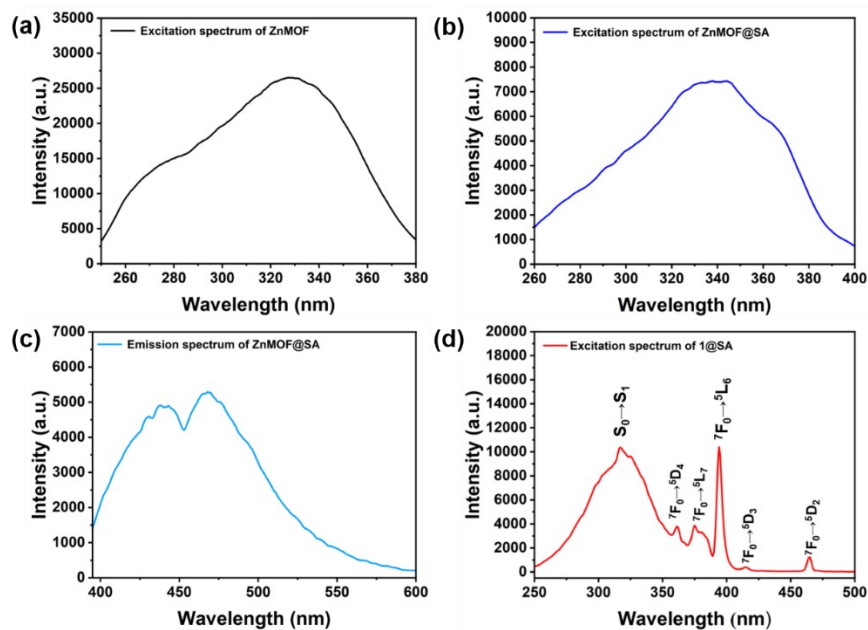

**Fig. S5.** Excitation spectra of (a) ZnMOF, (b) ZnMOF@SA ( $\lambda_{em} = 470$  nm), and (d) **1@SA** ( $\lambda_{em} = 615$  nm). (c) The emission spectrum of ZnMOF@SA ( $\lambda_{ex} = 365$  nm).

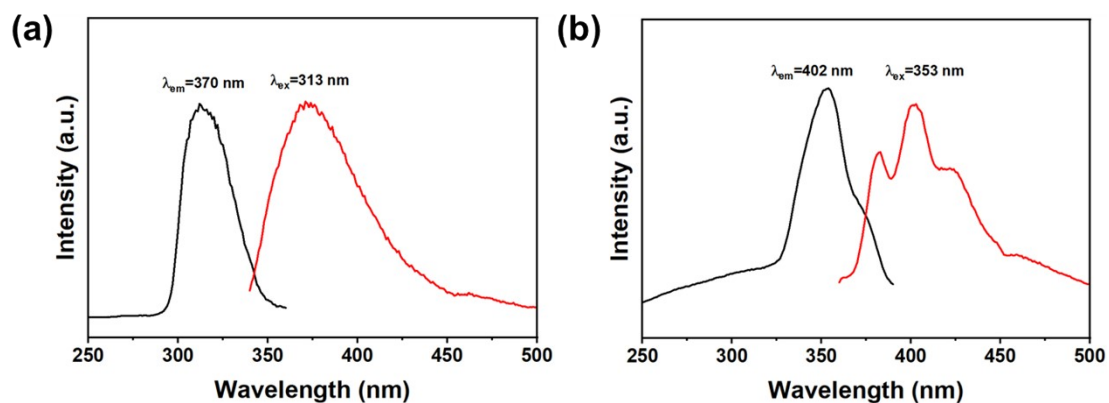

**Fig. S6.** The emission (red line) and excitation (black line) spectra of H<sub>3</sub>BTC (a) and bpbenz (b).

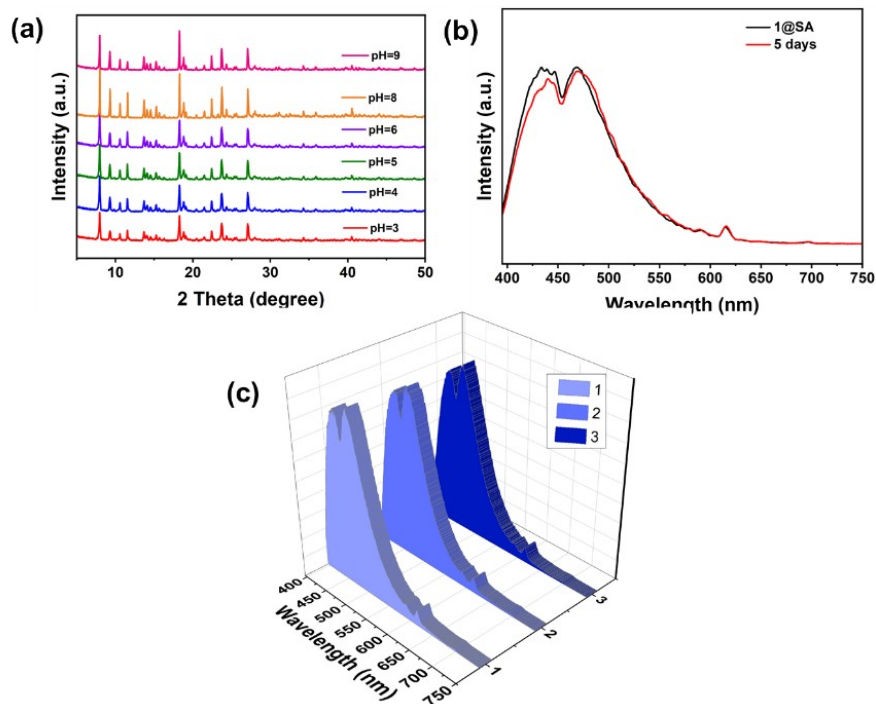

**Fig. S7.** (a) XRD patterns of ZnMOF in different pH values. (b) The fluorescence changes of **1@SA** before and after 5 days in the air at room temperature. (c) Emission spectra of different batches of **1@SA** prepared by the same method. ( $\lambda_{ex} = 365 \text{ nm}$ )

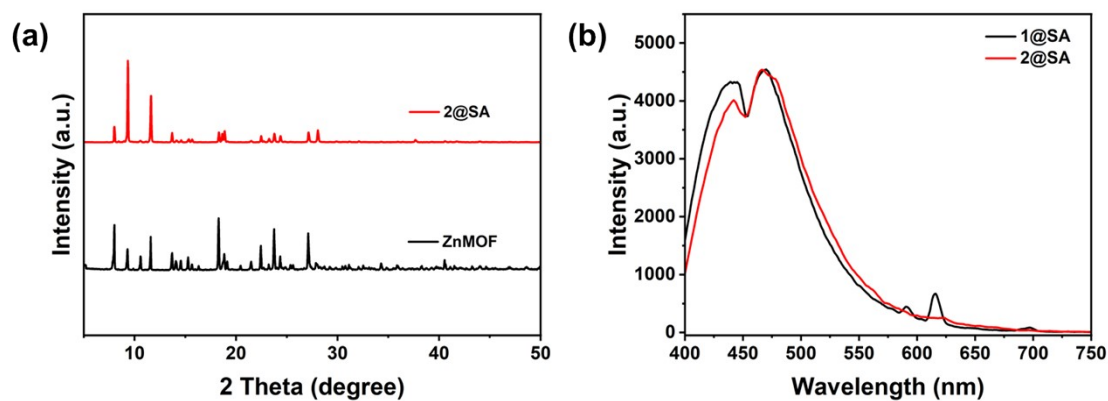

**Fig. S8.** (a) The XRD patterns of ZnMOF and **2@SA**. (b) The fluorescence spectra of **1@SA** and **2@SA** under the excitation of 365 nm.

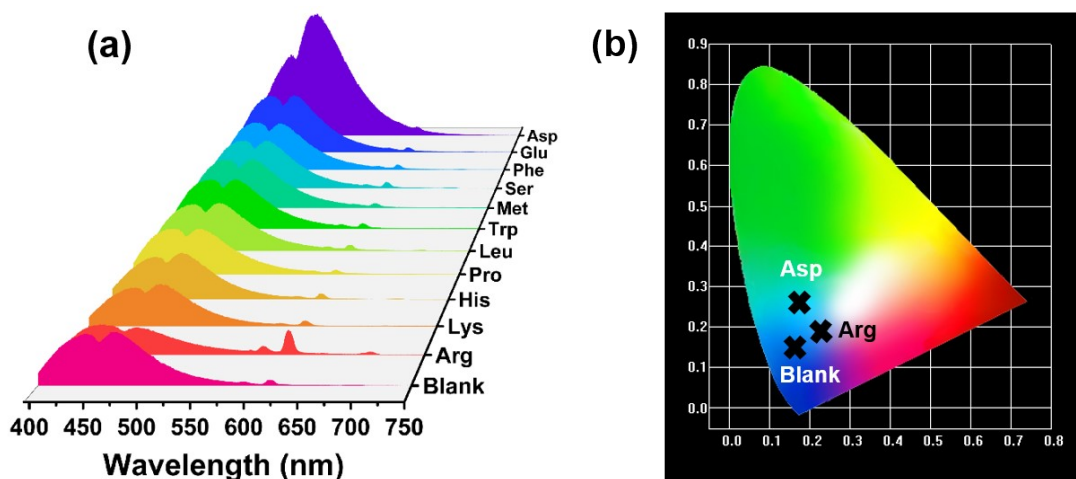

**Fig. S9.** Fluorescence spectra of **1@SA** in 10 mM different amino acids solution (a) and the corresponding CIE coordinates of **1@SA** in Arg or Asp solution (b).

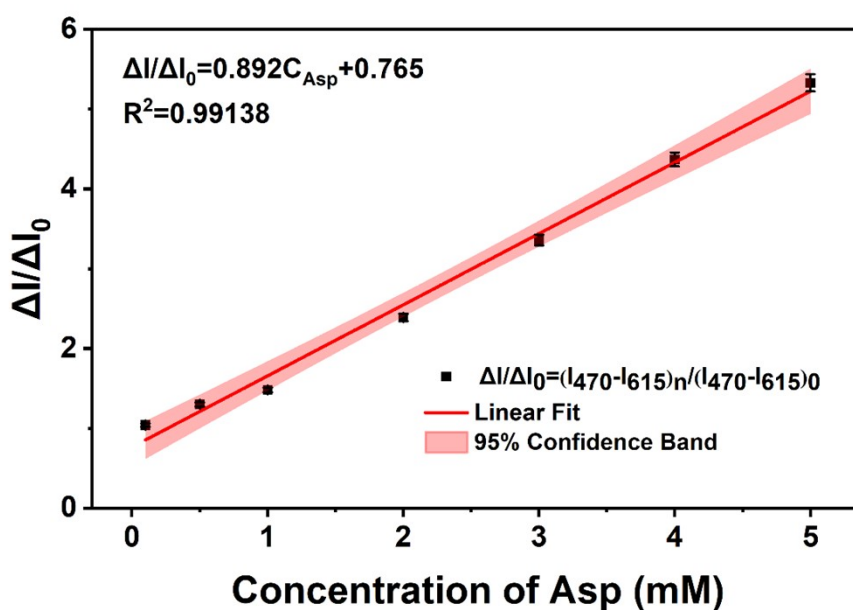

**Fig. S10.** The linear fitted curve showing  $\Delta I/\Delta I_0$  versus Asp concentration,  $\lambda_{ex} = 365$  nm.

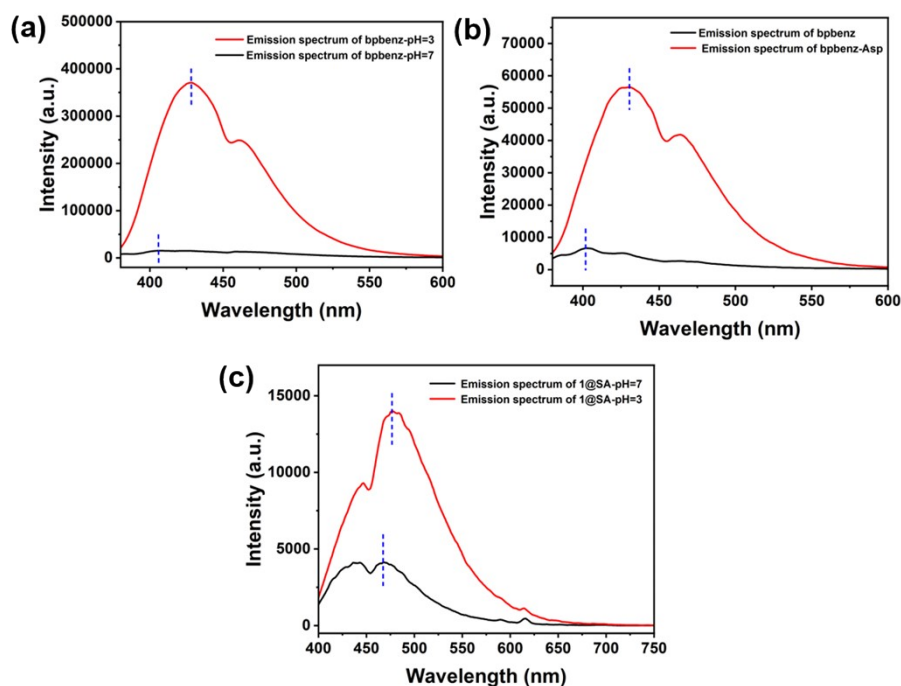

**Fig. S11.** The emission spectra of bpbz (a) and **1@SA** (c) in different pH solutions and the emission spectrum of bpbz in Asp solution (b). ( $\lambda_{ex}=365$  nm).

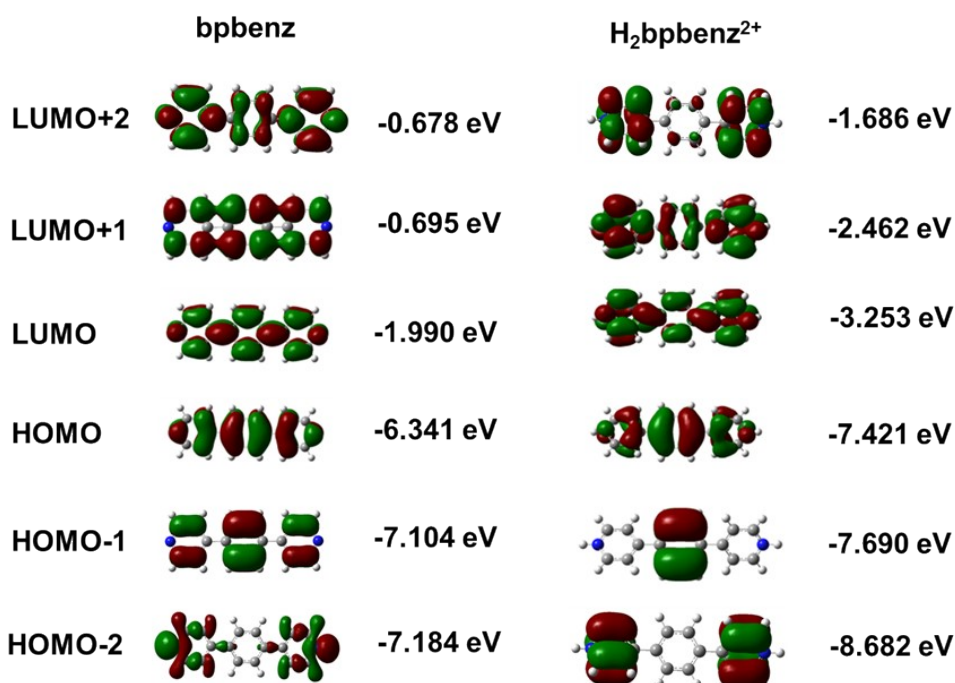

**Fig. S12.** The frontier molecular orbitals of bpbz and  $H_2bpbz^{2+}$ . The orbitals were obtained by the density functional theory (DFT) calculation based on the b3lyp/6-31g + G(d, p) level.



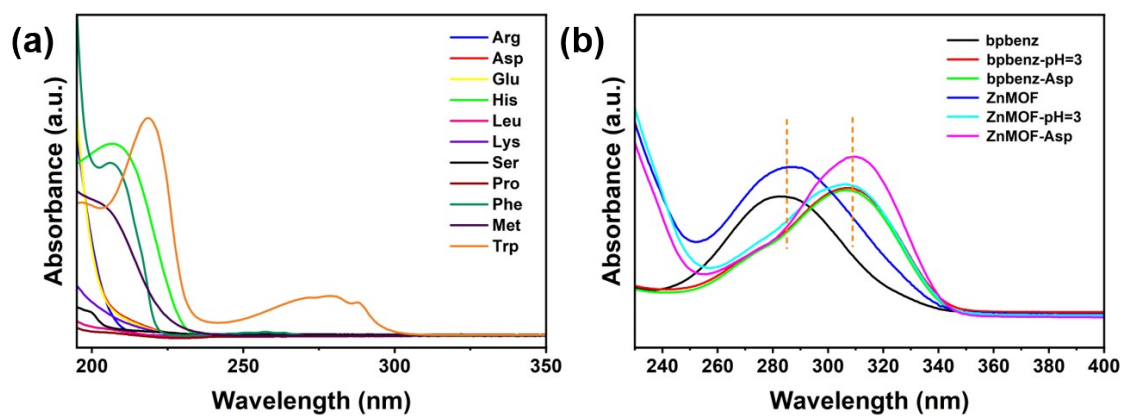

**Fig. S13.** The UV-vis absorption of various amino acid aqueous solution (a) and bpbenz and ZnMOF in different solutions (b).

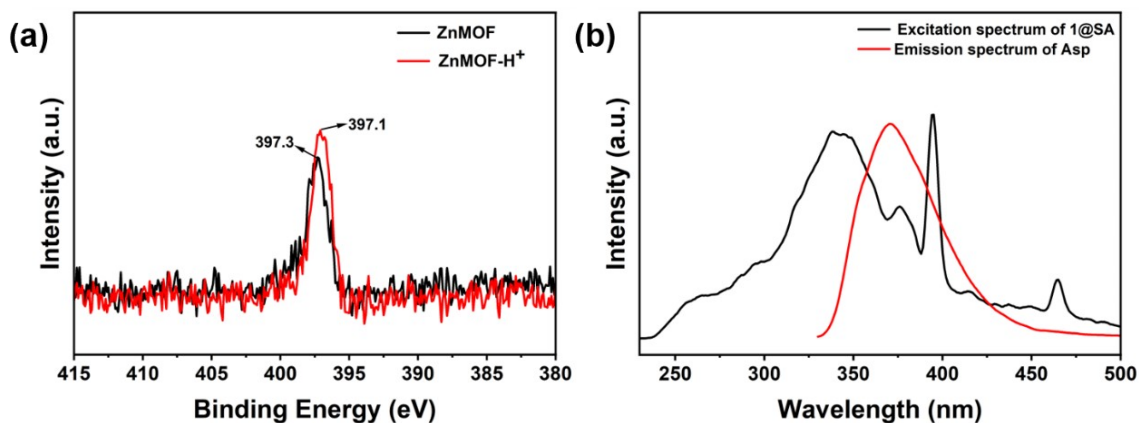

**Fig. S14.** (a) The XPS spectra of N 1s electron of ZnMOF without and with acid treatment. (b) The excitation spectrum of **1@SA** and emission spectrum of Asp.

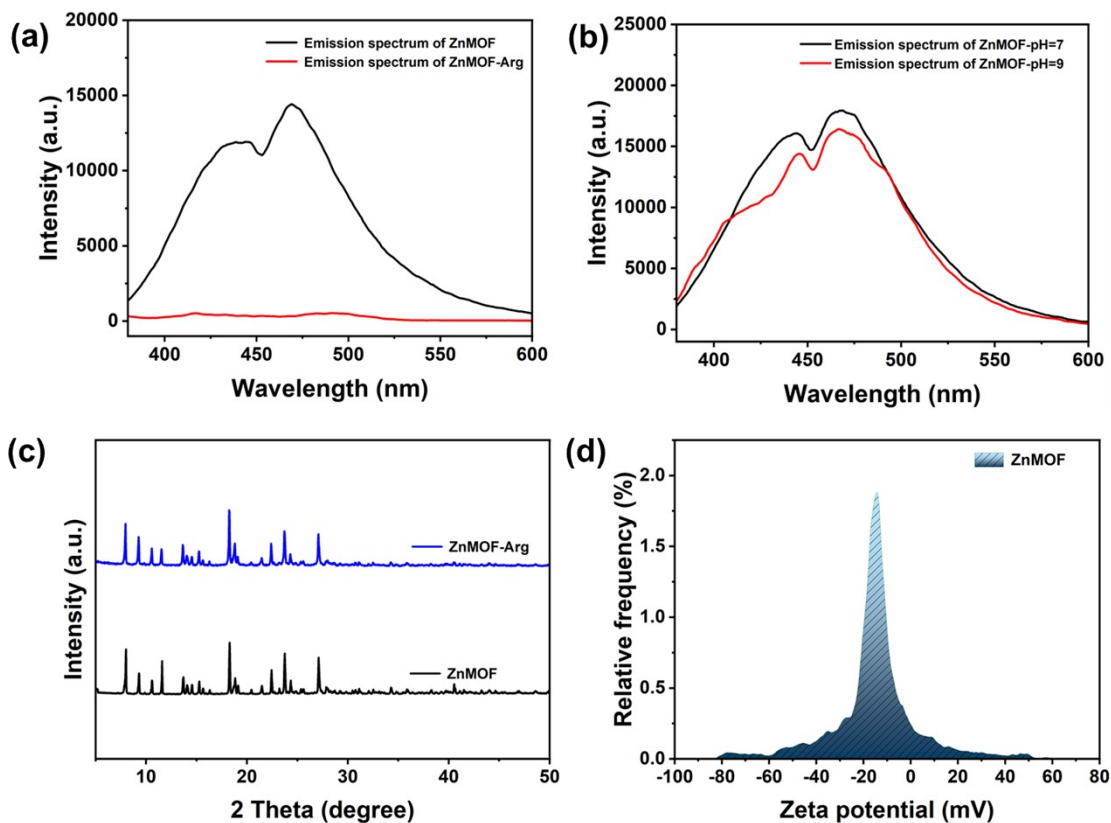

**Fig. S15.** The emission spectra of ZnMOF in Arg solution (a) and different pH solutions (b) under the excitation of 365 nm. (c) The PXRD patterns of ZnMOF without and with the Arg treatment. (d) The zeta potential of ZnMOF.

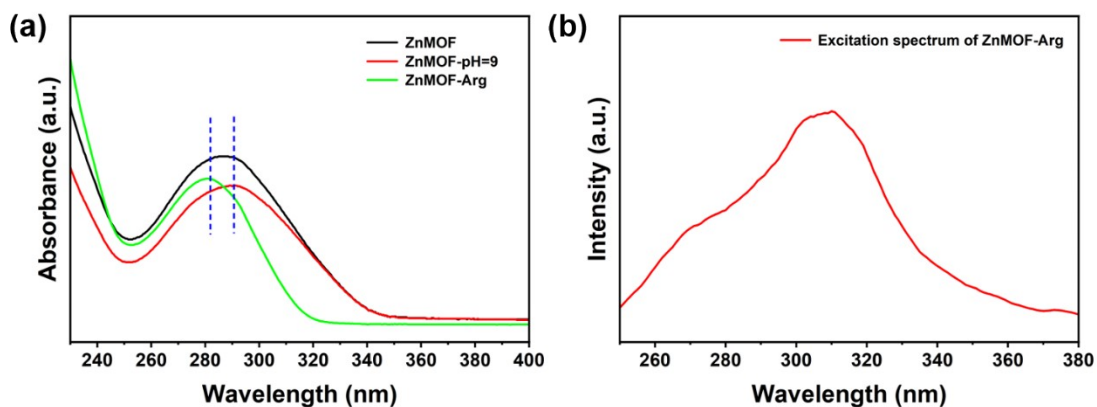

**Fig. S16.** (a) The UV-vis absorption of ZnMOF in an alkaline environment and Arg solution. (b) The excitation spectrum of ZnMOF in Arg solution.

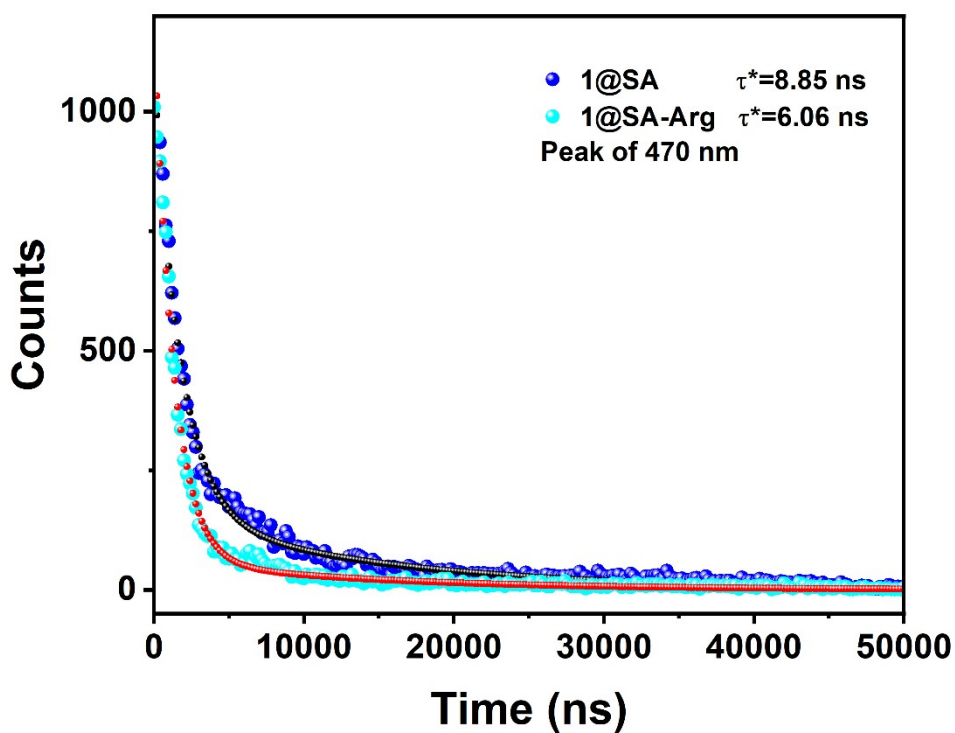

Fig. S17. Lifetime decay curves of the 1@SA at 470 nm in the absence and presence of Arg.

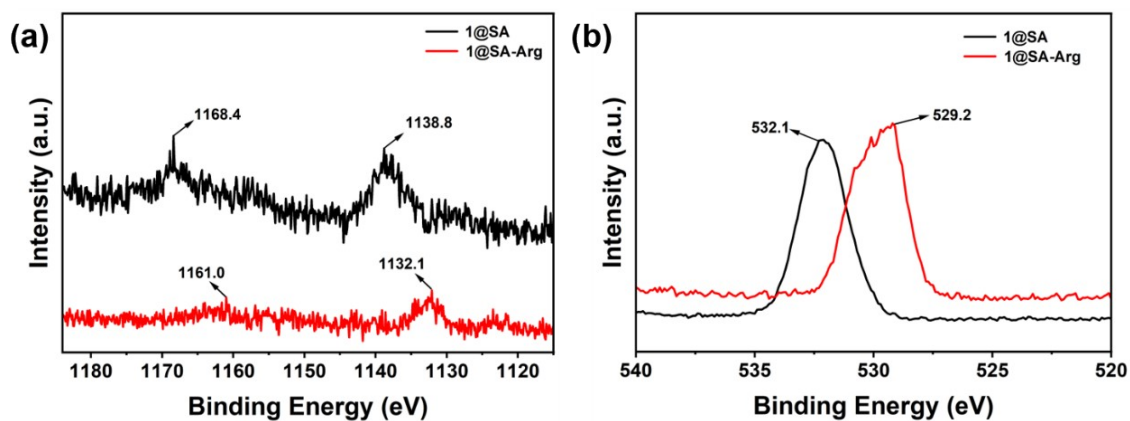

Fig. S18. The XPS spectra of Eu 3d (a) and O 1s (b) electrons in 1@SA without and with Arg.

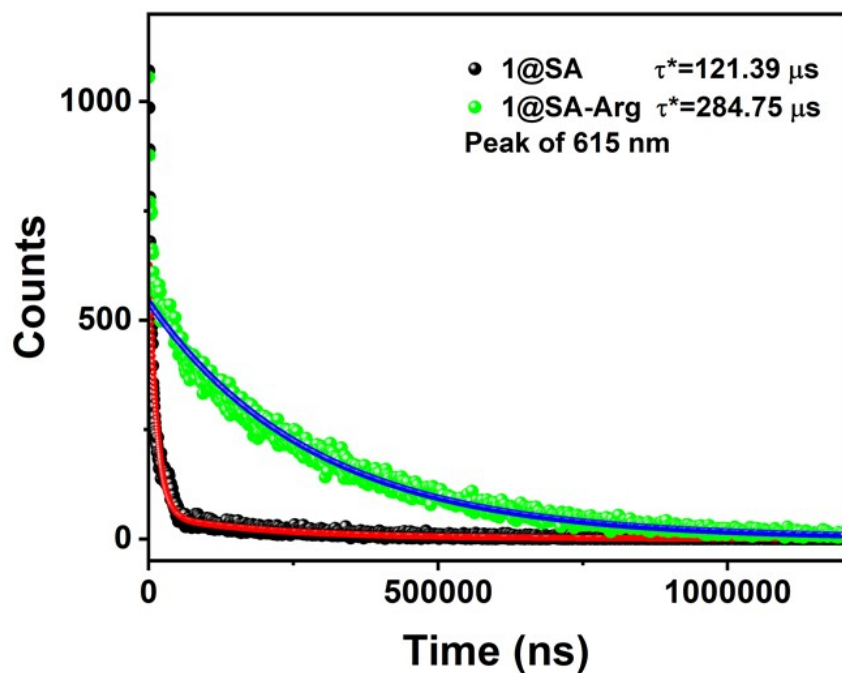

Fig. S19. Lifetime decay curves of **1@SA** at 615 nm in the absence and presence of Arg.

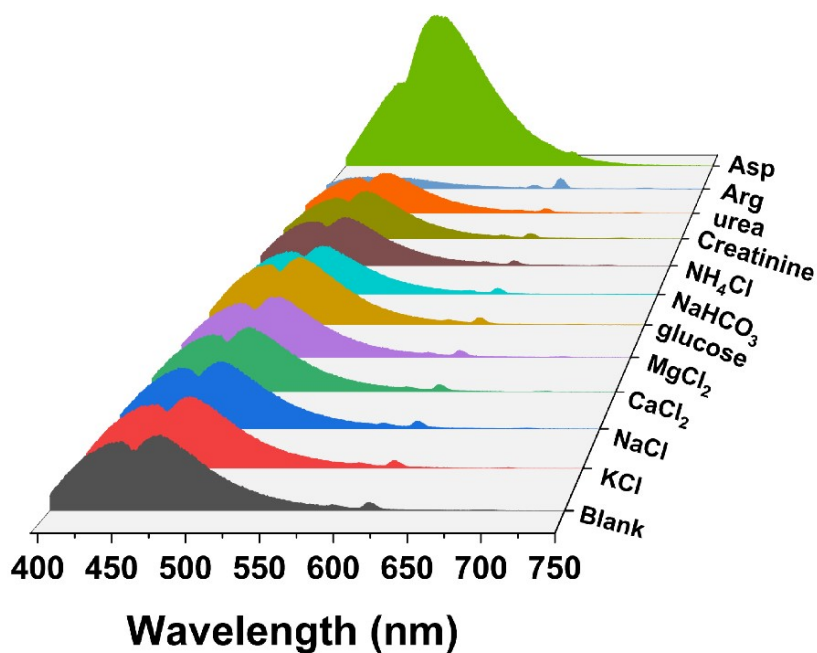

Fig. S20. Fluorescence spectra of **1@SA** in different serum species solutions (10 mM).

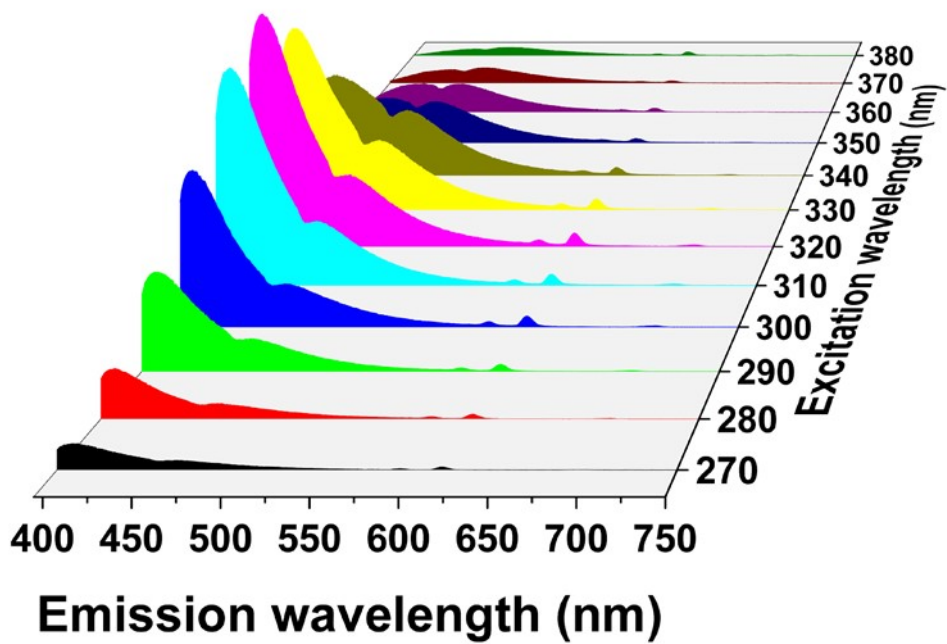

**Fig. S21.** Emission spectra of **1@SA** at different excitation wavelengths.

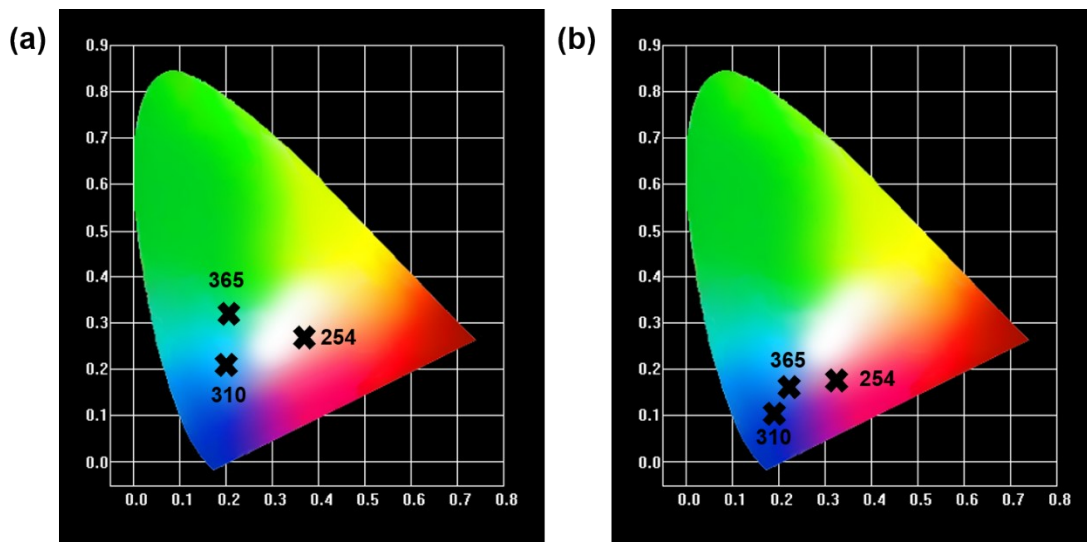

**Fig. S22.** The CIE coordinates of **1@SA** in Asp (a) and Arg (b) solution under different exciting wavelengths.

**Table S1.** Excitation and emission level transitions of Eu<sup>3+</sup> ions.

|                                                           | Transitions                                               | Wavelength (nm) | Energy gap(eV) |
|-----------------------------------------------------------|-----------------------------------------------------------|-----------------|----------------|
| Eu <sup>3+</sup>                                          | <sup>7</sup> F <sub>0</sub> → <sup>5</sup> D <sub>4</sub> | 361             | 3.43           |
|                                                           | <sup>7</sup> F <sub>0</sub> → <sup>5</sup> L <sub>7</sub> | 375             | 3.31           |
|                                                           | <sup>7</sup> F <sub>0</sub> → <sup>5</sup> L <sub>6</sub> | 394             | 3.15           |
|                                                           | <sup>7</sup> F <sub>0</sub> → <sup>5</sup> D <sub>3</sub> | 415             | 2.99           |
|                                                           | <sup>7</sup> F <sub>0</sub> → <sup>5</sup> D <sub>2</sub> | 465             | 2.67           |
|                                                           | <sup>7</sup> F <sub>0</sub> → <sup>5</sup> D <sub>1</sub> | 535             | 2.32           |
|                                                           | <sup>5</sup> D <sub>0</sub> → <sup>7</sup> F <sub>0</sub> | 579             | 2.14           |
|                                                           | <sup>5</sup> D <sub>0</sub> → <sup>7</sup> F <sub>1</sub> | 591             | 2.10           |
|                                                           | <sup>5</sup> D <sub>0</sub> → <sup>7</sup> F <sub>2</sub> | 615             | 2.02           |
|                                                           | <sup>5</sup> D <sub>0</sub> → <sup>7</sup> F <sub>3</sub> | 653             | 1.90           |
| <sup>5</sup> D <sub>0</sub> → <sup>7</sup> F <sub>4</sub> | 696                                                       | 1.78            |                |

$$\text{Energy} = 1240/\lambda \text{ (eV)}$$

**Table S2.** Summary of S<sub>1</sub> and T<sub>1</sub> energy level (eV) of H<sub>3</sub>BTC and bpbenz calculated by the time dependent density functional theory (TD-DFT) method.

|                               | H <sub>3</sub> BTC                                                                  | bpbenz                                                                                |
|-------------------------------|-------------------------------------------------------------------------------------|---------------------------------------------------------------------------------------|
| Optimized molecular structure | 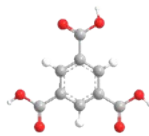 |  |
| S <sub>1</sub> (eV)           | 4.67                                                                                | 3.99                                                                                  |
| T <sub>1</sub> (eV)           | 2.66                                                                                | 1.93                                                                                  |

**Table S3.** Analysis report of the EDS energy spectra of ZnMOF and **1@SA**.

| Material    | Element | Weight % |
|-------------|---------|----------|
| ZnMOF       | C       | 58.82    |
|             | N       | 9.61     |
|             | O       | 18.23    |
|             | Zn      | 13.34    |
| <b>1@SA</b> | C       | 49.68    |
|             | N       | 3.53     |
|             | O       | 22.03    |
|             | Eu      | 21.52    |
|             | Zn      | 3.23     |

**Table S4.** Summary of transition type, energy, oscillator strength ( $f$ ) and the contribution (%) of bpbenz and H<sub>2</sub>bpbenz<sup>2+</sup> calculated by the time dependent density functional theory (TD-DFT) method.

| Molecule                            | Transitio<br>n                 | Energy<br>(eV) | $f$    | Type      | %    |
|-------------------------------------|--------------------------------|----------------|--------|-----------|------|
| bpbenz                              | S <sub>1</sub> →S <sub>0</sub> | 3.99           | 1.1300 | HOMO→LUMO | 97.5 |
| H <sub>2</sub> bpbenz <sup>2+</sup> | S <sub>1</sub> →S <sub>0</sub> | 3.73           | 0.9635 | HOMO→LUMO | 99.3 |

**Table S5.** Summary of decay lifetime of **1@SA** without and with Arg.

| Sample                     | 1@SA   | 1@SA-Arg | Sample                     | 1@SA   | 1@SA-Arg |
|----------------------------|--------|----------|----------------------------|--------|----------|
| $\lambda_{\text{ex}}$ (nm) | 365    | 365      | $\lambda_{\text{ex}}$ (nm) | 365    | 365      |
| $\lambda_{\text{em}}$ (nm) | 470    | 470      | $\lambda_{\text{em}}$ (nm) | 615    | 615      |
| $\tau_1$ (ns)              | 1.73   | 1.28     | $\tau_1$ ( $\mu\text{s}$ ) | 13.31  | 284.75   |
| $A_1$                      | 931.18 | 1134.73  | $A_1$                      | 616.86 | 541.59   |
| Percentage (%)             | 41.24  | 62.52    | Percentage (%)             | 42.70  | 100      |
| $\tau_2$ (ns)              | 13.85  | 14.0     | $\tau_2$ ( $\mu\text{s}$ ) | 201.91 | /        |
| $A_2$                      | 165.67 | 62.43    | $A_2$                      | 54.58  | /        |
| Percentage (%)             | 58.76  | 37.48    | Percentage (%)             | 57.3   | /        |
| $\chi^2$                   | 0.973  | 1.151    | $\chi^2$                   | 1.003  | 0.861    |

$$[\tau^* = (A_1\tau_1^2 + A_2\tau_2^2)/(A_1\tau_1 + A_2\tau_2)]$$

**Table S6.** The results of recovery experiments.

| Samples | No. | Spiked<br>(mM) | Measured<br>(mM) | Recovery<br>(%) | RSD<br>(%) |
|---------|-----|----------------|------------------|-----------------|------------|
| Asp     | 1   | 0.5            | 0.483            | 96.6            | 2.61       |
|         | 2   | 1              | 0.989            | 98.9            | 2.96       |
|         | 3   | 3              | 3.202            | 105.7           | 4.78       |
| Arg     | 1   | 0.05           | 0.048            | 95.5            | 2.83       |
|         | 2   | 0.3            | 0.315            | 104.9           | 3.12       |
|         | 3   | 0.5            | 0.461            | 92.2            | 5.17       |
